# Supplementary material for: Rewiring the altered tryptophan metabolism as a novel therapeutic strategy in inflammatory bowel diseases
Source: HighWire-hosted journal article supplement (doi:10.1136/gutjnl-2022-327337), 2022-10-21
Supplement: gutjnl-2022-327337supp008_data_supplement.xlsx [file gutjnl-2022-327337supp008_data_supplement.xlsx]

## Sheet: Feuil1
				Serum		Feces
	SUIVITHEQUE			IBD	Healthy controls	IBD	Healthy controls
			n	1069	98	518	81
			% Male	517 (48.4%)	63 (64.2%)	249 (48.1%)	32 (39.5%)
			Age (Year)	43.1 ± 14.1	41.8 ± 14.0	46.3 ± 14.3	38.6 ± 12.8
			UC /CD	281 / 788		165 / 353
			Flare / Remission /unknown	272 / 269 / 528		230 / 264 / 24
			Disease duration (year)	16.6 ± 9.2		17.4 ± 9.9
		Montreal Location	L1, n (%CD)	213 (27.0%)		95
			L2, n (%CD)	163 (20.7%)		78
			L3, n (%CD)	395 (50.1%)		173
			L4*, n (%CD)	174 (22.1%)		70
			E1, n (%UC)	14 (5.0%)		11
			E2, n (%UC)	75 (26.7%)		46
			E3, n (%UC)	185 (65.8%)		106
			E unknown, n (%UC)	13 (4.6%)		2
			History of intestinal resection, n (%)	313 (29.3%)		179 (34.6%)
		Current Treatment	5-ASA	59 (5.5%)		32 (6.2%)
			budesonide	17 (1.6%)		10 (1.9%)
			prednisone	55 (5.1%)		20 (3.9%)
			thiopurine	222 (20.8%)		94 (18.1%)
			methotrexate	55 (5.1%)		17 (3.3%)
			anti-TNFa	252 (23.6%)		89 (17.2%)
			ustekinumab	8 (0.7%)		3 (0.6%)
			vedolizumab	40 (3.7%)		(1.7%)
			unknown	165 (15.4%)		71 (13.7%)
			Breakdown of the cohort by diagnosis, sex, ethnicity, physical characteristics, and disease location. Numeric data are summarized as mean ± s.d., and with blank cells for NA (not applicable). *L4 can be associated with L1, L2 or L3
			Sampling between 06/2012 and 11/2019
